# Supplementary material for: Soil Microbial Community Response Differently to the Frequency and Strength of Freeze–Thaw Events in a Larix gmelinii Forest in the Daxing’an Mountains, China
Source: Front Microbiol. 2020 Jun 3;11:1164. doi: 10.3389/fmicb.2020.01164 (PMC7283528; doi:10.3389/fmicb.2020.01164)
Supplement: Supplementary file 2 [file Data_Sheet_2.xlsx]

## Sheet: Sheet1
Treat	layer	cycle	SWC	pH	TOC	DOC	TN	NO3--N	NH4+-N	C/N	BG	CBH	NAG	LAP	qCO2	GP	GN	A	F	AMF	tPLFA	F/B	(BG+CBH)/MBC	(NAG+LAP)/MBC
C	0-10	1	34.75	5.35	100.098	73.1819	5.10599	2.235	3.07	19.604	20.8658	24.408	40.4945	21.8574	0.328706	17.6088	10.6588	5.27911	4.61074	1.95848	45.3911	0.169214	0.0495439	0.0480177
C	0-10	1	36	5.38	101.711	77.073	5.0877	2.335	3.46	19.9915	13.0671	56.0148	44.179	21.1433	0.289308	28.6616	17.3226	9.43976	7.54302	3.52241	76.2191	0.169836	0.0361609	0.0519906
C	0-10	1	36.25	5.3	100.904	69.2909	4.96845	2.425	3.245	20.309	16.9823	28.4511	45.0964	18.3674	0.218875	33.5143	22.7865	12.3161	9.44961	4.48982	93.6754	0.17482	0.035722	0.0464433
H	0-10	1	35.25	5.62	91.9434	57.0367	4.59042	2.145	2.57	20.0294	13.5942	39.091	30.5866	35.7138	0.168205	18.945	29.4395	8.71543	10.4301	2.88256	80.8321	0.197168	0.0619618	0.0506479
H	0-10	1	34.5	5.72	93.1551	85.4236	4.74733	2.135	1.96	19.6226	13.4554	43.6609	33.29	12.8171	0.156935	20.1647	31.7687	9.28585	11.6047	3.14647	87.3315	0.203239	0.0466771	0.044718
H	0-10	1	35.25	5.64	96.5492	65.3594	4.86887	2.115	1.53	19.8299	13.7555	70.6626	28.2646	24.2654	0.155551	21.3845	34.0979	9.85627	12.7792	3.41037	93.831	0.208518	0.0481985	0.0376823
L	0-10	1	42.5	5.41	123.468	64.6822	6.414	1.965	2.64	19.2497	20.9634	52.0307	77.5756	29.731	0.168771	20.8501	33.1893	9.09951	13.1784	3.30587	91.5834	0.219501	0.0341059	0.0493916
L	0-10	1	41.5	5.09	113.598	90.9197	6.0902	2.41	3.135	18.6526	21.9823	37.1637	59.1859	18.5347	0.121897	21.9291	35.7419	10.0796	14.3555	3.62919	98.1754	0.224274	0.0388267	0.0413408
L	0-10	1	41.5	5.22	108.533	80.2625	5.82521	1.985	3.715	18.6316	19.9127	52.1151	49.2099	7.45603	0.112762	27.7312	47.6487	12.6596	19.9311	4.75252	129.567	0.235344	0.0911994	0.0905436
C	0-10	3	40.25	5.44	108.543	60.6288	5.09629	2.125	0.945	21.2984	22.5038	33.5005	40.1628	15.8452	0.221897	24.9733	42.2232	10.503	14.3809	4.05904	109.482	0.202544	0.032128	0.0339647
C	0-10	3	41.75	5.41	115.64	71.7811	5.90876	2.02	1.055	19.5709	23.8472	43.0205	49.6891	25.8607	0.081539	21.9152	37.729	9.7711	12.0647	3.36639	96.545	0.190239	0.0298897	0.0287835
C	0-10	3	40.75	5.54	102.091	104.606	5.25802	2.005	1.14	19.4163	18.4384	47.6171	47.2541	14.3285	0.0729565	23.5508	40.3569	10.8392	13.3484	3.81374	104.964	0.195464	0.0275584	0.0289127
H	0-10	3	40.25	5.35	112.386	74.9662	4.58552	2.515	3.165	24.509	19.7209	28.7971	93.2105	13.8642	0.294855	22.3073	28.6448	10.2909	12.8349	3.49205	90.3768	0.220486	0.0459549	0.0865525
H	0-10	3	39.75	5.31	107.527	54.5818	4.56564	2.145	3.18	23.5513	17.983	37.8631	70.205	17.4366	0.183177	23.1202	27.7678	10.9118	12.6787	3.7461	91.1145	0.219907	0.0384817	0.0762433
H	0-10	3	40	5.27	100.196	70.4971	4.57558	2.125	3.24	21.8979	16.2504	47.4271	98.1853	28.2826	0.161726	21.9331	24.8909	9.53279	12.3225	3.00015	83.2522	0.225567	0.0324394	0.0605396
L	0-10	3	38.75	5.3	95.9268	79.9084	4.60492	2.425	2.515	20.8314	12.5552	11.6575	62.1235	14.8288	0.166735	23.0226	33.2816	10.1198	9.49811	2.90711	91.1404	0.157556	0.0309946	0.0610798
L	0-10	3	38.25	5.38	92.8368	78.1219	4.61116	2.495	2.15	20.1331	15.6888	25.2073	61.3895	8.92059	0.143427	23.5384	33.9627	10.5997	10.1909	3.04077	92.8531	0.166183	0.019428	0.0583104
L	0-10	3	39	5.37	101.974	72.1969	4.92908	2.375	2.08	20.6882	10.6834	5.94352	65.7636	10.5474	0.111142	24.0542	34.6437	11.0797	10.8838	3.17444	95.5658	0.172478	0.0143995	0.0608912
C	0-10	7	36	5.65	92.2203	110.702	4.69896	2.55	2.2	19.6257	11.5701	26.1336	108.279	6.39719	0.201388	9.99538	5.21502	2.78479	2.10199	1.05351	23.822	0.152686	0.0358082	0.0865921
C	0-10	7	37	5.33	90.4282	83.6166	4.50083	2.57	2.59	20.0915	21.3809	19.3859	115.897	8.25866	0.134859	21.338	13.9624	6.91537	5.30897	2.42174	56.602	0.158185	0.0295532	0.0813853
C	0-10	7	36.6	5.69	98.3243	83.1097	4.84998	3.375	2.38	20.2731	16.0512	29.9608	101.891	7.89222	0.130488	24.6805	16.0332	8.44596	6.07743	2.78996	66.067	0.155025	0.0220331	0.0770747
H	0-10	7	39.4	5.5	104.447	97.9981	5.30239	2.64	0.935	19.698	38.7775	24.5943	101.154	15.2325	0.127474	19.2933	26.5731	8.86227	7.28144	2.46764	72.9869	0.154165	0.0705029	0.0875407
H	0-10	7	38.6	5.48	113.362	84.3159	5.8842	3.075	1.035	19.2655	53.6511	13.5627	76.4923	14.9317	0.19837	20.7834	27.2638	9.34595	7.91109	2.86895	77.0087	0.16277	0.0772663	0.13579
H	0-10	7	40.8	5.5	94.8904	91.7997	5.05325	2.935	0.865	18.7781	41.4595	47.7463	110.669	9.23913	0.141434	18.2736	24.7023	8.42963	6.94039	2.27027	68.5781	0.155147	0.0646052	0.105821
L	0-10	7	37.4	5.66	88.2916	106.403	4.15127	3.445	2.13	21.2686	27.2345	19.7237	39.5987	16.2159	0.295213	28.3405	23.0411	10.4297	6.25352	2.24491	78.6866	0.121081	0.0576181	0.0499309
L	0-10	7	37	5.47	86.5716	101.401	4.17509	3.385	1.88	20.7353	24.2287	2.4458	33.651	14.9254	0.22792	31.5147	25.2025	11.6509	6.96084	2.62692	87.5698	0.122948	0.0280148	0.0440639
L	0-10	7	37.4	5.36	92.4316	101.855	4.46318	3.145	2.315	20.7098	44.684	3.75038	33.8101	3.80678	0.144943	24.689	19.0093	8.58876	5.46816	2.00892	66.615	0.126435	0.0255621	0.0358958
C	0-10	12	38	5.04	110.105	123.77	5.48892	2.755	3.27	20.0595	29.5456	26.0692	48.0156	19.6847	0.103267	15.8362	20.1545	6.91071	5.44185	1.73494	57.3349	0.143083	0.033879	0.0388378
C	0-10	12	37.8	5.03	94.3725	121.62	4.91902	2.765	3.27	19.1852	32.2884	36.8803	43.0956	20.4423	0.103823	18.6465	26.9084	8.13632	8.00601	2.49133	73.3955	0.166894	0.0318952	0.0374041
C	0-10	12	36.8	5.22	102.239	81.7625	5.12832	2.63	3.055	19.9361	31.6603	21.5366	58.8506	15.6529	0.0886791	21.4569	33.6623	9.36193	10.5702	3.24771	89.4561	0.182684	0.0318822	0.0366669
H	0-10	12	35	5.52	85.5025	138.666	4.57032	2.53	5.145	18.7082	15.714	13.1729	31.2456	12.8203	0.102888	19.137	29.7597	8.02333	9.31867	2.69971	78.9175	0.179649	0.0200172	0.0411173
H	0-10	12	36.2	5.19	81.9646	151.5	4.46568	2.885	5	18.3543	15.4659	20.8458	32.063	39.2871	0.0966575	18.5051	28.0325	7.71923	8.29721	2.37794	74.1123	0.168279	0.0198849	0.0333678
H	0-10	12	35.4	5.25	93.7336	142.706	4.86418	4.58	5.21	19.2702	15.2836	18.4788	35.8103	24.8978	0.09214	19.0732	29.1054	8.01514	8.87575	2.65618	77.107	0.175858	0.0173354	0.0268445
L	0-10	12	38	5.66	92.9764	137.489	4.66006	3.66	6.6	19.9518	16.1636	8.82324	31.6356	7.55201	0.18146	20.3032	32.293	8.64381	9.73132	2.87879	83.6479	0.177513	0.0222678	0.0651297
L	0-10	12	36.6	5.61	89.392	151.577	4.73488	3.575	5.425	18.8795	14.2652	2.08859	16.1395	11.0209	0.146498	20.8025	33.2323	8.96951	10.1527	3.01345	85.9949	0.180783	0.0171624	0.0317079
L	0-10	12	38.2	5.64	97.1842	140.899	4.87953	3.5	5.43	19.9167	11.0576	14.2084	73.7599	15.0731	0.134	21.3019	34.1716	9.2952	10.5741	3.14812	88.3418	0.183896	0.00985502	0.0177604
C	10-20	1	30.5	5.3	63.4479	76.1974	3.4389	2.86	2.865	18.45	11.1883	25.5426	21.9145	8.78338	0.59545	16.0081	20.9672	7.94738	6.14751	1.89977	41.2737	0.153846	0.078574	0.0560296
C	10-20	1	30.25	5.25	59.1337	55.6131	2.97122	2.92	1.82	19.9022	12.0103	41.81	24.088	7.56635	0.366683	15.1065	19.2684	7.69963	5.5385	1.62755	38.7865	0.145829	0.0751091	0.0646143
C	10-20	1	30.5	5.32	61.2908	77.3697	3.20506	2.805	1.895	19.1231	12.6225	22.7664	23.5223	14.7267	0.22543	18.1217	24.3696	9.45188	6.62252	2.05122	46.405	0.144829	0.0759113	0.0659094
H	10-20	1	30.75	5.25	52.3978	71.978	3.14888	3.025	1.93	16.6401	13.0145	34.5751	23.2394	8.6052	0.271353	13.5649	16.6937	6.64308	5.27489	1.55261	50.331	0.156941	0.0776364	0.0510035
H	10-20	1	31	5.22	62.3695	75.0455	3.11036	2.695	1.995	20.0522	9.4842	34.5786	14.1541	15.5273	0.190769	15.9848	22.7785	8.38007	6.36713	2.01637	63.7168	0.151509	0.0613544	0.0404507
H	10-20	1	30.75	5.24	58.5384	70.7321	3.12962	2.43	1.61	18.7046	9.64372	45.9954	10.9958	15.0014	0.126795	16.1313	20.8634	8.11706	6.06763	1.88012	61.0375	0.149704	0.0641515	0.0285395
L	10-20	1	34.75	5.29	60.4468	97.2841	3.55542	2	2.195	17.0013	9.81835	51.4283	26.6369	8.32724	0.298033	11.6329	15.4225	5.04669	4.70388	1.35438	43.6743	0.161055	0.103185	0.0583496
L	10-20	1	33.75	5.31	67.7733	53.4858	3.94434	2.47	2.41	17.1824	10.2527	23.4678	19.7915	11.0511	0.232579	12.2472	17.8474	5.80661	5.44086	1.49798	48.883	0.16543	0.0886978	0.0541377
L	10-20	1	34.75	5.35	63.211	76.4265	3.34257	2.54	2.38	18.9109	15.2193	42.185	22.3168	9.68917	0.144839	17.3108	24.2723	8.16653	6.77784	2.00526	67.1047	0.150598	0.0584378	0.0493657
C	10-20	3	35	5.38	65.8423	67.7248	3.54739	2.39	1.065	18.5608	9.95129	29.6476	20.4929	5.86335	0.435803	13.2551	18.9497	5.89625	5.26932	1.50069	51.9994	0.149682	0.0636183	0.0358494
C	10-20	3	34.75	5.45	65.5532	79.0519	3.59517	3.185	0.86	18.2337	12.7513	28.3015	26.806	7.00554	0.303261	16.4112	24.6377	7.45227	6.67213	2.05567	66.3584	0.151444	0.0428103	0.0288804
C	10-20	3	35.25	5.46	56.6977	80.2155	3.37128	2.645	1.26	16.8179	11.1141	48.8033	8.20944	7.88056	0.234607	14.9697	21.8047	6.8083	5.67493	1.81065	58.1988	0.147606	0.0466202	0.017151
H	10-20	3	30	5.72	50.4741	66.8389	2.92057	2.91	1.74	17.2823	10.0935	46.8454	29.1868	7.09536	0.282076	18.5647	21.1555	7.89273	6.19446	1.85666	63.6675	0.144762	0.0836723	0.0500415
H	10-20	3	30.75	5.54	55.4465	80.0451	3.48138	2.685	1.88	15.9266	9.44863	18.3811	30.2468	8.7822	0.255452	20.1787	23.4392	8.22814	6.90412	2.19565	69.9225	0.149611	0.0784385	0.0515299
H	10-20	3	29.5	5.67	57.896	70.8702	3.0987	2.29	1.86	18.684	7.4869	55.1653	28.525	7.79534	0.251738	17.0087	21.723	7.96354	6.01379	1.93463	62.5936	0.145455	0.0364305	0.0501651
L	10-20	3	30.75	5.44	51.885	65.8648	3.1024	3.495	2.3	16.7242	8.50844	19.9893	22.0166	12.11	0.172051	18.2299	22.641	8.22634	5.80428	2.06145	64.9052	0.1379	0.0305646	0.0474614
L	10-20	3	30	5.47	53.7827	57.4642	3.09325	3.5	1.925	17.3871	7.2106	19.3811	27.1484	7.22389	0.197846	17.1123	20.3148	7.73388	5.31368	1.87076	59.6232	0.137006	0.0393759	0.0523537
L	10-20	3	30.5	5.26	58.8338	63.7346	3.09782	3.295	2.01	18.992	7.98462	17.5119	32.142	9.23667	0.18794	15.9947	17.9885	7.24141	4.82308	1.68008	54.3413	0.135941	0.0362053	0.0428218
C	10-20	7	31	5.38	58.6255	62.8046	3.30768	3.04	2.19	17.7241	18.5713	23.5319	27.5275	9.60264	0.204229	36.9834	55.0699	2.19086	3.1751	3.5351	120.977	0.0587241	0.0470957	0.0623362
C	10-20	7	31.4	5.52	56.0121	63.0984	3.29277	2.765	2.66	17.0106	18.7452	19.3845	45.0629	6.35077	0.188056	24.6402	29.7239	3.80329	3.52211	2.57614	76.9071	0.0861226	0.043637	0.0618933
C	10-20	7	31.6	5.6	61.7319	72.6068	3.5303	2.85	2.405	17.4863	18.3707	19.7157	44.7025	10.8954	0.132493	20.2969	14.3778	7.01571	4.46912	1.81718	53.2377	0.13389	0.0436565	0.0391737
H	10-20	7	32	5.49	56.4592	72.3423	3.22086	2.39	1.04	17.5292	16.2055	34.529	41.7425	11.0279	0.228456	19.2933	26.5731	8.86227	7.28144	2.46764	72.9869	0.154165	0.0529406	0.0552102
H	10-20	7	31.8	5.52	63.2012	83.1582	3.44382	2.325	0.8	18.3521	18.5764	29.7262	28.0225	13.6396	0.230131	21.7834	31.3638	10.5646	8.81091	2.96895	86.2272	0.158231	0.0538683	0.0530964
H	10-20	7	31.8	5.54	52.8302	71.477	3.08253	2.335	0.835	17.1386	18.0862	30.192	36.5585	9.67539	0.110378	18.2736	24.7023	8.42963	6.94039	2.27027	68.5781	0.155147	0.0553074	0.0453928
L	10-20	7	30.8	5.15	52.7668	74.5387	2.99621	3.715	2.015	17.6112	11.0254	16.155	15.0474	11.7435	0.273988	14.4658	22.1308	6.46196	4.00217	1.46311	54.3894	0.111709	0.0421759	0.0400384
L	10-20	7	30.2	5.61	51.7427	77.7253	2.82298	3.41	1.925	18.3291	10.9286	8.68219	10.5348	10.4417	0.272018	15.7413	25.8277	7.38875	4.79397	1.89757	62.1973	0.120556	0.0385705	0.037345
L	10-20	7	29.8	5.53	58.2547	78.6714	3.10959	3.56	2.155	18.7339	12.0661	13.6703	13.4694	10.3399	0.23075	12.3593	19.5246	5.31555	3.58577	1.33203	47.2128	0.116274	0.0329105	0.0350313
C	10-20	12	33.8	5.24	63.5647	95.8502	3.90761	3.245	2.6	16.2669	7.9851	12.5175	16.9191	7.47344	0.289666	12.7631	18.8493	6.15633	4.32616	6.20271	55.3778	0.234763	0.0344235	0.0259059
C	10-20	12	32.6	5.16	56.7368	134.43	3.34156	2.895	2.395	16.9791	9.48083	23.7018	17.4119	7.14669	0.189867	15.427	21.1348	7.74038	4.94672	7.14972	65.6102	0.226043	0.0251068	0.0259096
C	10-20	12	34	5.35	59.1508	132.899	3.16245	2.93	2.78	18.7041	9.52351	14.1559	16.7877	7.59226	0.326569	10.091	15.4204	4.65123	3.56727	4.69672	43.7694	0.232753	0.0231879	0.0270691
H	10-20	12	31.6	5.54	55.1677	148.953	3.34473	3.005	2.525	16.4939	9.38184	20.2946	11.9915	11.1251	0.133968	25.5408	31.9009	11.5684	8.63784	2.77891	91.1484	0.14319	0.0308283	0.0227121
H	10-20	12	30.2	5.49	53.6511	154.646	3.22202	2.795	2.37	16.6514	8.27193	25.4233	13.6036	9.71971	0.142864	24.5572	26.5976	10.2398	7.47453	2.20292	80.7243	0.136212	0.0294679	0.0234515
H	10-20	12	30.4	5.58	54.4094	158.352	3.08337	4.045	2.755	17.6461	9.01214	19.0211	14.5169	7.37221	0.0620342	21.5737	13.2944	7.22663	4.85273	1.02694	54.9573	0.119803	0.0284157	0.0201602
L	10-20	12	31	5.66	60.743	144.057	3.9089	3.715	3.635	15.5397	8.11395	17.4287	11.8523	6.15199	0.15423	23.332	27.8973	9.43502	7.33414	2.42324	79.5651	0.139775	0.03074	0.0267751
L	10-20	12	32.8	5.68	66.7892	162.554	4.00563	3.745	3.66	16.6738	6.96594	10.419	10.6302	6.9163	0.0632893	24.0643	29.2555	10.1602	7.81578	2.55995	83.4611	0.141967	0.0271313	0.0193759
L	10-20	12	30.4	5.68	56.766	160.653	3.24573	3.64	3.63	17.4895	11.262	17.9706	11.325	13.6098	0.0537179	26.1965	33.4137	12.0854	8.98155	2.97584	94.5205	0.144827	0.0185233	0.0178811
Layer, soil layer; Treat, freeze-thaw temperature fluctuation; Cycle, the number of freeze-thaw cycles. C, H, and L represent freeze-thaw treatment of 4, −4 to 4, and −14 to 4◦C, respectively. SWC, soil water content; TOC, soil total organic carbon; DOC, dissolved organic carbon; TN, total nitrogen; C/N, the ratio of total organic carbon and total nitrogen. BG, β-glucosidase; CBH, β-cellobiosidas…
